# Supplementary material for: Raf-like kinases CBC1 and CBC2 negatively regulate stomatal opening by negatively regulating plasma membrane H+-ATPase phosphorylation in Arabidopsis
Source: Royal Society of Chemistry journal article supplement (doi:10.1039/c9pp00329k), 2019-12-23
Supplement: c9pp00329k3.pdf [file c9pp00329k3.pdf]

**Table S1.** Primers used in this study.

| Genes        | Purpose                      | Primer sequence (5' to 3')                            |
|--------------|------------------------------|-------------------------------------------------------|
| <i>PHOT1</i> | Cloning for                  | F: CCCAAGCTTATGGAACCAACAGAAAAACCATCG                  |
|              | pFLAG-MAC<br>in AlphaScreen  | R: CCCAAGCTTTCAAAAAACATTTGTTTGCAGATCTTC               |
| <i>PHOT2</i> | Cloning for                  | F: ATGGAGAGGCCAAGAGCCCCTCC                            |
|              | pFLAG-MAC<br>in AlphaScreen  | R: TTAGAAGAGGTCAATGTCCAAGTCC                          |
| <i>FLAG:</i> | Cloning for                  | F: GGGGTACCATGGACTACAAGGACGACGATGAC                   |
| <i>PHOT1</i> | pEU3-NII in<br>AlphaScreen   | R: GGGGTACCTCAAAAAACATTTGTTTGCAGATCTTC                |
| <i>FLAG:</i> | Cloning for                  | F: GGGGTACCATGGACTACAAGGACGACGATGAC                   |
| <i>PHOT2</i> | pEU3-NII in<br>AlphaScreen   | R: GGGGTACCTTAGAAGAGGTCAATGTCCAAGTCC                  |
| <i>CBC1</i>  | Cloning for                  | F: CCCCTCGAGGATCCCATGAAGGAGAAGGCGGAGAGTG              |
|              | pEU6G in pull-<br>down assay | R: GCGGCCGCGGTACCCTCATGGGCCTCGGTGTGC                  |
| <i>CBC2</i>  | Cloning for                  | F: CCCCTCGAGGATCCCATGAAAGAAGGAAAGGATGGGTTTG           |
|              | pEU6G in pull-<br>down assay | R: GCGGCCGCGGTACCCTTAAGGACCACGTTTCCTTCG               |
| <i>PHOT1</i> | Cloning for                  | F: CACCTCGAGGATCCC ATGGAACCAACAGAAAAACCATCG           |
|              | pEU6H in pull-<br>down assay | R: GCGGCCGCGGTACCC<br>TCAAAAAACATTTGTTTGCAGATCTTCTAGC |
| <i>PHOT2</i> | Cloning for                  | F: CACCTCGAGGATCCCATGGAGAGGCCAAGAGCCCCT               |

|              |                                               |                                                                                             |
|--------------|-----------------------------------------------|---------------------------------------------------------------------------------------------|
|              | pEU6H in pull-down assay                      | R: GCGGCCGCGGTACCCTTAGAAGAGGTCAATGTCCAAGTCCG                                                |
| <i>BLUS1</i> | Cloning for pEU6H in pull-down assay          | F: CACCTCGAGGATCCC ATGGCTCGGAACAAGCTCGAGTTC<br>R: GCGGCCGCGGTACCCTTAACCCAAAACACTATCTTTATCAG |
| <i>AHA1</i>  | Cloning for pEU6H in pull-down assay          | F: CACCTCGAGGATCCC ATGTCAGGTCTCGAAGATATCAAG<br>R: GCGGCCGCGGTACCCCTACACAGTGTAGTGATGTCTCTGC  |
| <hr/>        |                                               |                                                                                             |
| <i>CBC1</i>  | RT-PCR                                        | F: AAATGAAGGAGAAGGCCGAGAGTG<br>R: ATCCCAAAGCTATACACATCGCAC                                  |
| <hr/>        |                                               |                                                                                             |
| <i>CBC2</i>  | RT-PCR                                        | F: ATGAAAGAAGGAAAGGATGGGTTTG<br>R: TTAAGGACCACGTTTCCTTCGG                                   |
| <i>TUB2</i>  | RT-PCR                                        | F: CATTGTTGATCTCTAAGATCCGTG<br>R: TACTGCTGAGAACCTCTTGAG                                     |
| <hr/>        |                                               |                                                                                             |
| <i>CBC1</i>  | Cloning for pCAMBIA1303 in promoter GUS assay | F: AACTGCAGGATTCAGCCTTTGAAGATCAATGTG<br>R: CATGCCATGGCCATTTTCTTCTGCAAAACCAAACC              |
| <hr/>        |                                               |                                                                                             |
| <i>CBC2</i>  | Cloning for pCAMBIA1303 in promoter GUS assay | F: CGGAATTCCTTGTCAGAAAATGGCACTGACTAG<br>R: CATGCCATGGCCATTGTCAAGCAAAGATCCTATGA              |
| <i>CBC1</i>  | Cloning for CaMV35S-                          | F: TCTAGAGGATCCATGAAGGAGAAGGCCGAGAGTG<br>R: CCCTTGCTCACCATGGATGGGCCTCGGTGTGC                |
| <hr/>        |                                               |                                                                                             |

sGFP(S65T)-

NOS3' in

particle

bombardment

---

*CBC2* Cloning for F: TCTAGAGGATCCATGAAAGAAGGAAAGGATGGGTTTG

CaMV35S- R: CCCTTGCTCACCATGGAAGGACCACGTTTCCTTCG

sGFP(S65T)-

NOS3' in

particle

bombardment
