# Supplementary figures and images for: Raf-like kinases CBC1 and CBC2 negatively regulate stomatal opening by negatively regulating plasma membrane H+-ATPase phosphorylation in Arabidopsis
Source: Royal Society of Chemistry journal article supplement (doi:10.1039/c9pp00329k), 2019-12-23

### Supplementary Figure 3

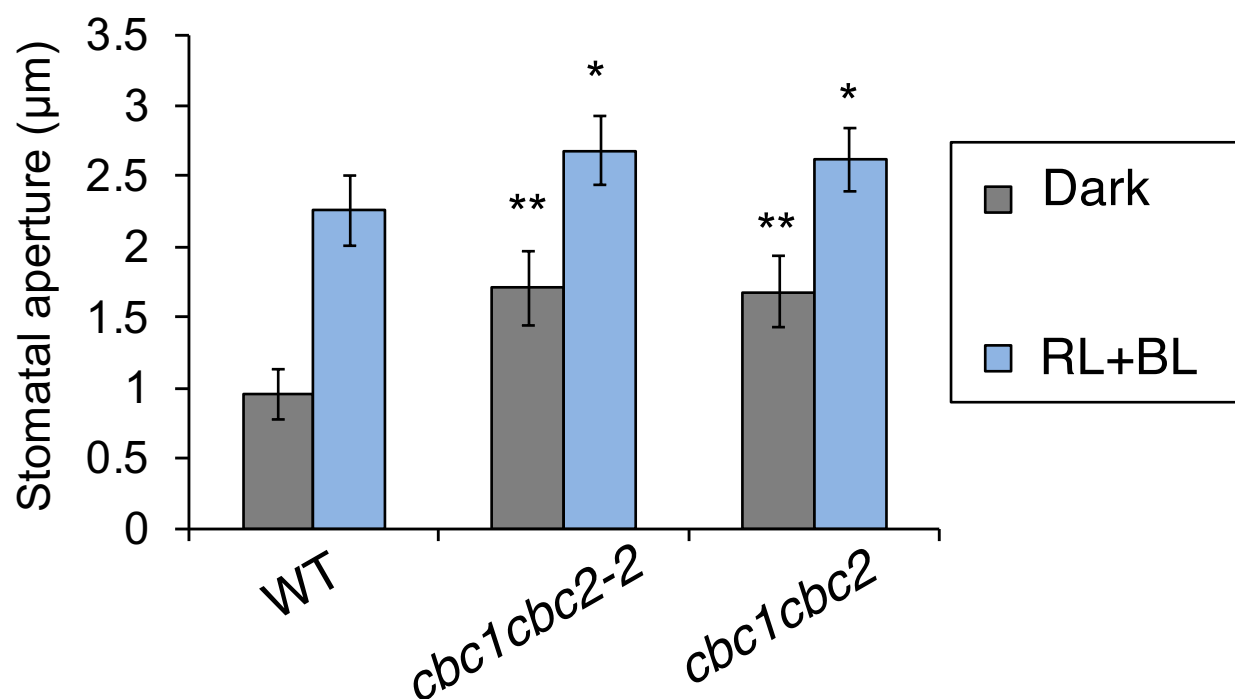

Supplement: c9pp00329k2.pdf [file c9pp00329k2.pdf]

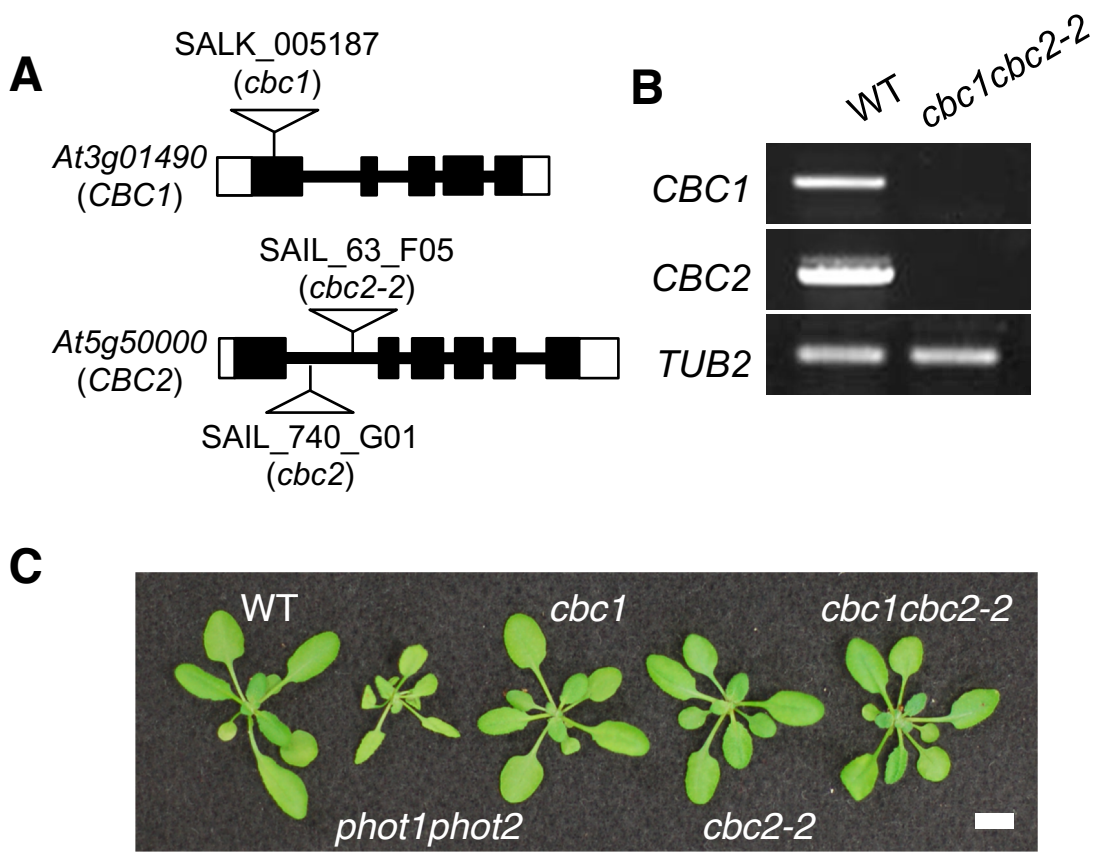

Supplement: c9pp00329k5.pdf [file c9pp00329k5.pdf]
